# Supplementary material
Source: PubMed Central journal article supplement (PMC1324995)
Supplement: pnas_0509054103_1.pdf [file pnas_0509054103_1.pdf]

**A**

Immunization  
on day 0:

□ DC only  
■ DC + gp33

d0 // d2 d3 d5 d7

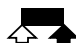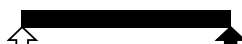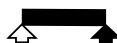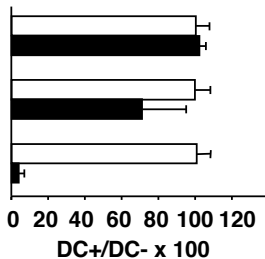**B**

Immunization  
on day 0:

□ No DC  
■ Male DC

d0 d4 d8 d12

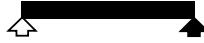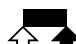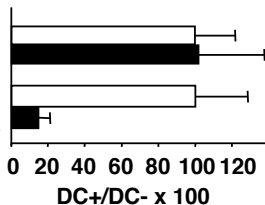

⬇ Inject  
target DC

⬆ Harvest  
target DC
