# Supplementary material
Source: PubMed Central journal article supplement (PMC1324995)

**Untreated**

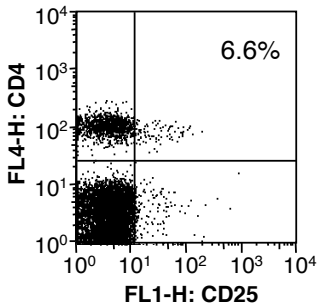

**PC61**

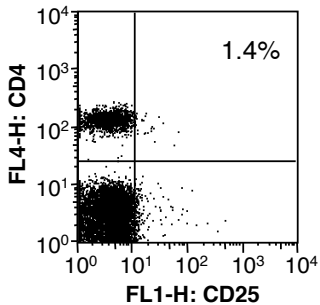

Supplement: pnas_0509054103_2.pdf [file pnas_0509054103_2.pdf]

**C57BL/6****DC  
only**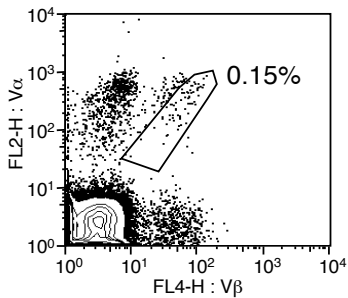**PKO**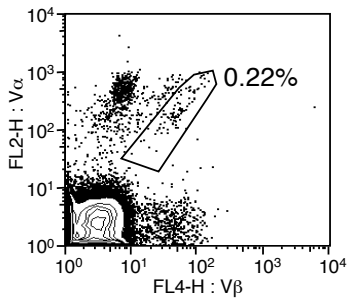**DC +  
gp33**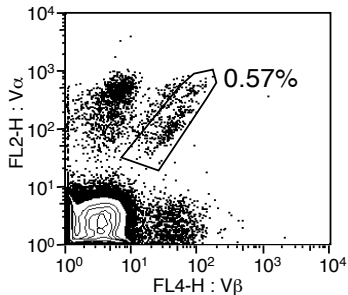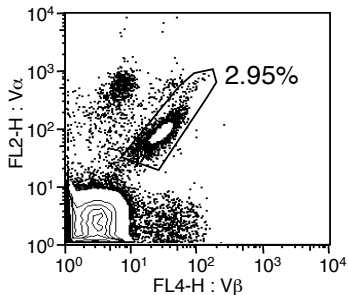

Supplement: pnas_0509054103_3.pdf [file pnas_0509054103_3.pdf]
